# Supplementary material for: Interrelationships of Fiber-Associated Anaerobic Fungi and Bacterial Communities in the Rumen of Bloated Cattle Grazing Alfalfa
Source: Microorganisms. 2020 Oct 7;8(10):1543. doi: 10.3390/microorganisms8101543 (PMC7601590; doi:10.3390/microorganisms8101543)
Supplement: Supplementary file 1 [file microorganisms-08-01543-s001.zip]

Archive with 6 entries (6 files):
- Figure_S1.pdf
- Figure_S2.pdf
- Figure_S3.pdf
- Supplementary_File1.xlsx
- Supplementary_File2.xlsx
- Supplementary_File3.xlsx
