# Supplementary material for: Interrelationships of Fiber-Associated Anaerobic Fungi and Bacterial Communities in the Rumen of Bloated Cattle Grazing Alfalfa
Source: Microorganisms. 2020 Oct 7;8(10):1543. doi: 10.3390/microorganisms8101543 (PMC7601590; doi:10.3390/microorganisms8101543)
Supplement: Supplementary file 1 [file microorganisms-08-01543-s001.zip › Supplementary_File1.xlsx]

## Sheet: Pairwise_Contrasts_Genus_Set2
Wilcoxon signed-rank tests between groups for each Fungi Genera (B:Bloated; NB: non-bloated; AlfaSain=Alfalfa sainfoin; Palfa= Pure Alfalfa; AlfaAlfasure=Alfalfa Alfasure)				Per-Genus Abundance Summaries for each group (Diet x Bloat combination)
Genus	p.value	p.value.FDR (Benjamini-Hochberg)	Compairison (paired-Wilcoxon signed-rank test) (B:Bloated; NB: non-bloated)	Group	Genus	mean	sd	median	min	max	IQR	Prevalence
Anaeromyces	0.193359	0.257812	AlfalfaAlfasure_AlfaSain	AlfalfaAlfasure.NB	Anaeromyces	0.00848571	0.00612611	0.00707143	0.000428571	0.0162857	0.0105357	100
Buwchfawromyces	0.0488281	0.0976562	AlfalfaAlfasure_AlfaSain	AlfalfaSainfoin.B	Anaeromyces	0.00864286	0.00307691	0.007	0.00657143	0.0144286	0.00214286	100
Caecomyces	0.130859	0.209375	AlfalfaAlfasure_AlfaSain	AlfalfaSainfoin.NB	Anaeromyces	0.00925714	0.0105846	0.00685714	0.000285714	0.0265714	0.00942857	100
Cyllamyces	0.00585938	0.015625	AlfalfaAlfasure_AlfaSain	Basline.NB	Anaeromyces	0.000416667	0.000676832	0.000142857	0	0.00214286	0.000428571	58.3333
Neocallimastix	0.00390625	0.015625	AlfalfaAlfasure_AlfaSain	PureAlfalfa.B	Anaeromyces	0.00677922	0.00372874	0.00628571	0	0.0121429	0.00507143	90.9091
Orpinomyces	0.695312	0.794643	AlfalfaAlfasure_AlfaSain	AlfalfaAlfasure.NB	Buwchfawromyces	0.00442857	0.0063774	0.000428571	0	0.016	0.00792857	70
Piromyces	0.921875	0.921875	AlfalfaAlfasure_AlfaSain	AlfalfaSainfoin.B	Buwchfawromyces	0.00245238	0.00316152	0.000571429	0.000428571	0.008	0.003	100
Unclassified Neocallimastigaceae	0.00390625	0.015625	AlfalfaAlfasure_AlfaSain	AlfalfaSainfoin.NB	Buwchfawromyces	0.0125714	0.00945181	0.0144286	0.000571429	0.0228571	0.0144286	100
Anaeromyces	0.1875	0.375	AlfalfaAlfasure_AlfaSainB	Basline.NB	Buwchfawromyces	1.19048e-05	4.12393e-05	0	0	0.000142857	0	8.33333
Buwchfawromyces	0.625	0.625	AlfalfaAlfasure_AlfaSainB	PureAlfalfa.B	Buwchfawromyces	0.00702597	0.00862692	0.004	0	0.0271429	0.0103571	81.8182
Caecomyces	0.3125	0.416667	AlfalfaAlfasure_AlfaSainB	AlfalfaAlfasure.NB	Caecomyces	0.395414	0.0437242	0.397214	0.307429	0.469714	0.0333214	100
Cyllamyces	0.0625	0.166667	AlfalfaAlfasure_AlfaSainB	AlfalfaSainfoin.B	Caecomyces	0.336905	0.123962	0.313929	0.182571	0.521	0.144321	100
Neocallimastix	0.0625	0.166667	AlfalfaAlfasure_AlfaSainB	AlfalfaSainfoin.NB	Caecomyces	0.312314	0.189771	0.255571	0.164143	0.632571	0.139	100
Orpinomyces	0.3125	0.416667	AlfalfaAlfasure_AlfaSainB	Basline.NB	Caecomyces	0.0803214	0.028194	0.0721429	0.0415714	0.153429	0.0185357	100
Piromyces	0.4375	0.5	AlfalfaAlfasure_AlfaSainB	PureAlfalfa.B	Caecomyces	0.349416	0.173532	0.328714	0.126714	0.760429	0.18	100
Unclassified Neocallimastigaceae	0.0625	0.166667	AlfalfaAlfasure_AlfaSainB	AlfalfaAlfasure.NB	Cyllamyces	0.0716	0.0728202	0.0337143	0	0.185143	0.132893	90
Anaeromyces	0.00195312	0.003125	Baseline_AlfaAlfasureNB	AlfalfaSainfoin.B	Cyllamyces	0.142857	0.161369	0.116357	0.00128571	0.418286	0.183893	100
Buwchfawromyces	0.105469	0.105469	Baseline_AlfaAlfasureNB	AlfalfaSainfoin.NB	Cyllamyces	0.149629	0.149502	0.138286	0.00471429	0.370286	0.187143	100
Caecomyces	0.00195312	0.003125	Baseline_AlfaAlfasureNB	Basline.NB	Cyllamyces	0.0100714	0.0111291	0.00721429	0	0.0314286	0.0146429	83.3333
Cyllamyces	0.0195312	0.0223214	Baseline_AlfaAlfasureNB	PureAlfalfa.B	Cyllamyces	0.213532	0.196419	0.124	0.00657143	0.526143	0.347929	100
Neocallimastix	0.00195312	0.003125	Baseline_AlfaAlfasureNB	AlfalfaAlfasure.NB	Neocallimastix	0.162714	0.0565846	0.164357	0.0778571	0.254857	0.0850357	100
Orpinomyces	0.0195312	0.0223214	Baseline_AlfaAlfasureNB	AlfalfaSainfoin.B	Neocallimastix	0.104143	0.0431063	0.111	0.0468571	0.156429	0.0619643	100
Piromyces	0.00195312	0.003125	Baseline_AlfaAlfasureNB	AlfalfaSainfoin.NB	Neocallimastix	0.0869429	0.0302914	0.0917143	0.0525714	0.122286	0.049	100
Unclassified Neocallimastigaceae	0.00195312	0.003125	Baseline_AlfaAlfasureNB	Basline.NB	Neocallimastix	0.24744	0.0487106	0.252714	0.148	0.332857	0.0584643	100
Anaeromyces	0.000976562	0.00130208	Baseline_AlfaSain	PureAlfalfa.B	Neocallimastix	0.0739481	0.0312156	0.0708571	0.0295714	0.137429	0.0311429	100
Buwchfawromyces	0.000976562	0.00130208	Baseline_AlfaSain	AlfalfaAlfasure.NB	Orpinomyces	0.159429	0.0965655	0.1425	0.00614286	0.358714	0.0984286	100
Caecomyces	0.0136719	0.015625	Baseline_AlfaSain	AlfalfaSainfoin.B	Orpinomyces	0.222762	0.0951799	0.229357	0.101286	0.344571	0.136464	100
Cyllamyces	0.000976562	0.00130208	Baseline_AlfaSain	AlfalfaSainfoin.NB	Orpinomyces	0.183514	0.22212	0.07	0.0394286	0.565286	0.143143	100
Neocallimastix	0.000976562	0.00130208	Baseline_AlfaSain	Basline.NB	Orpinomyces	0.15669	0.1307	0.101214	0.0162857	0.439857	0.163036	100
Orpinomyces	0.101562	0.101562	Baseline_AlfaSain	PureAlfalfa.B	Orpinomyces	0.199247	0.139699	0.150286	0.0141429	0.490714	0.1625	100
Piromyces	0.000976562	0.00130208	Baseline_AlfaSain	AlfalfaAlfasure.NB	Piromyces	0.124414	0.0673949	0.0977857	0.0427143	0.250143	0.0966786	100
Unclassified Neocallimastigaceae	0.000976562	0.00130208	Baseline_AlfaSain	AlfalfaSainfoin.B	Piromyces	0.137571	0.0728422	0.114143	0.0712857	0.270429	0.063	100
Anaeromyces	0.03125	0.0416667	Baseline_AlfaSainB	AlfalfaSainfoin.NB	Piromyces	0.2136	0.128502	0.178571	0.0707143	0.395143	0.151286	100
Buwchfawromyces	0.03125	0.0416667	Baseline_AlfaSainB	Basline.NB	Piromyces	0.401857	0.147491	0.410071	0.183429	0.618571	0.246143	100
Caecomyces	0.0625	0.0714286	Baseline_AlfaSainB	PureAlfalfa.B	Piromyces	0.120701	0.0398142	0.117286	0.08	0.225857	0.0235714	100
Cyllamyces	0.03125	0.0416667	Baseline_AlfaSainB	AlfalfaAlfasure.NB	Unclassified Neocallimastigaceae	0.0735143	0.0318076	0.0765714	0.02	0.112429	0.0501786	100
Neocallimastix	0.03125	0.0416667	Baseline_AlfaSainB	AlfalfaSainfoin.B	Unclassified Neocallimastigaceae	0.0446667	0.024313	0.0450714	0.0164286	0.0788571	0.03475	100
Orpinomyces	0.4375	0.4375	Baseline_AlfaSainB	AlfalfaSainfoin.NB	Unclassified Neocallimastigaceae	0.0321714	0.0161208	0.0362857	0.00557143	0.0467143	0.012	100
Piromyces	0.03125	0.0416667	Baseline_AlfaSainB	Basline.NB	Unclassified Neocallimastigaceae	0.10319	0.0228881	0.101857	0.0615714	0.144429	0.0242857	100
Unclassified Neocallimastigaceae	0.03125	0.0416667	Baseline_AlfaSainB	PureAlfalfa.B	Unclassified Neocallimastigaceae	0.0293506	0.01498	0.028	0.013	0.0672857	0.0109286	100
Anaeromyces	0.0625	0.0833333	Baseline_AlfaSainNB
Buwchfawromyces	0.0625	0.0833333	Baseline_AlfaSainNB
Caecomyces	0.3125	0.3125	Baseline_AlfaSainNB
Cyllamyces	0.0625	0.0833333	Baseline_AlfaSainNB
Neocallimastix	0.0625	0.0833333	Baseline_AlfaSainNB
Orpinomyces	0.125	0.142857	Baseline_AlfaSainNB
Piromyces	0.0625	0.0833333	Baseline_AlfaSainNB
Unclassified Neocallimastigaceae	0.0625	0.0833333	Baseline_AlfaSainNB
Anaeromyces	0.00195312	0.003125	Baseline_PAlfaB
Buwchfawromyces	0.0185547	0.0247396	Baseline_PAlfaB
Caecomyces	0.0537109	0.0613839	Baseline_PAlfaB
Cyllamyces	0.000976562	0.00195312	Baseline_PAlfaB
Neocallimastix	0.000976562	0.00195312	Baseline_PAlfaB
Orpinomyces	0.0830078	0.0830078	Baseline_PAlfaB
Piromyces	0.000976562	0.00195312	Baseline_PAlfaB
Unclassified Neocallimastigaceae	0.000976562	0.00195312	Baseline_PAlfaB
Anaeromyces	0.193359	0.257812	PureAlfalfa_AlfalfaAlfasure
Buwchfawromyces	0.0488281	0.0976562	PureAlfalfa_AlfalfaAlfasure
Caecomyces	0.130859	0.209375	PureAlfalfa_AlfalfaAlfasure
Cyllamyces	0.00585938	0.015625	PureAlfalfa_AlfalfaAlfasure
Neocallimastix	0.00390625	0.015625	PureAlfalfa_AlfalfaAlfasure
Orpinomyces	0.695312	0.794643	PureAlfalfa_AlfalfaAlfasure
Piromyces	0.921875	0.921875	PureAlfalfa_AlfalfaAlfasure
Unclassified Neocallimastigaceae	0.00390625	0.015625	PureAlfalfa_AlfalfaAlfasure
Anaeromyces	0.431641	0.690625	PureAlfalfa_AlfaSain
Buwchfawromyces	0.431641	0.690625	PureAlfalfa_AlfaSain
Caecomyces	0.695312	0.794643	PureAlfalfa_AlfaSain
Cyllamyces	0.0488281	0.390625	PureAlfalfa_AlfaSain
Neocallimastix	0.275391	0.690625	PureAlfalfa_AlfaSain
Orpinomyces	0.921875	0.921875	PureAlfalfa_AlfaSain
Piromyces	0.160156	0.640625	PureAlfalfa_AlfaSain
Unclassified Neocallimastigaceae	0.695312	0.794643	PureAlfalfa_AlfaSain
Anaeromyces	0.4375	0.875	PureAlfalfa_AlfaSainB
Buwchfawromyces	0.8125	0.928571	PureAlfalfa_AlfaSainB
Caecomyces	1	1	PureAlfalfa_AlfaSainB
Cyllamyces	0.3125	0.875	PureAlfalfa_AlfaSainB
Neocallimastix	0.4375	0.875	PureAlfalfa_AlfaSainB
Orpinomyces	0.1875	0.875	PureAlfalfa_AlfaSainB
Piromyces	0.8125	0.928571	PureAlfalfa_AlfaSainB
Unclassified Neocallimastigaceae	0.625	0.928571	PureAlfalfa_AlfaSainB
Anaeromyces	0.8125	1	PureAlfalfa_AlfaSainNB
Buwchfawromyces	0.0625	0.5	PureAlfalfa_AlfaSainNB
Caecomyces	0.8125	1	PureAlfalfa_AlfaSainNB
Cyllamyces	0.3125	0.625	PureAlfalfa_AlfaSainNB
Neocallimastix	1	1	PureAlfalfa_AlfaSainNB
Orpinomyces	0.3125	0.625	PureAlfalfa_AlfaSainNB
Piromyces	0.1875	0.625	PureAlfalfa_AlfaSainNB
Unclassified Neocallimastigaceae	1	1	PureAlfalfa_AlfaSainNB
Anaeromyces	0.329004	0.685714	AlfaSainB_NB
Buwchfawromyces	0.030303	0.242424	AlfaSainB_NB
Caecomyces	0.662338	0.756957	AlfaSainB_NB
Cyllamyces	0.792208	0.792208	AlfaSainB_NB
Neocallimastix	0.662338	0.756957	AlfaSainB_NB
Orpinomyces	0.428571	0.685714	AlfaSainB_NB
Piromyces	0.329004	0.685714	AlfaSainB_NB
Unclassified Neocallimastigaceae	0.428571	0.685714	AlfaSainB_NB
