# Supplementary material for: Interrelationships of Fiber-Associated Anaerobic Fungi and Bacterial Communities in the Rumen of Bloated Cattle Grazing Alfalfa
Source: Microorganisms. 2020 Oct 7;8(10):1543. doi: 10.3390/microorganisms8101543 (PMC7601590; doi:10.3390/microorganisms8101543)
Supplement: Supplementary file 1 [file microorganisms-08-01543-s001.zip › Supplementary_File2.xlsx]

## Sheet: Pairwise_Contrasts_Genus_Set2
Amplicon sequence variants_Baseline hay diet vs and other treatment goups.
Wilcoxon signed-rank tests between groups (B:Bloated; NB: non-bloated; AlfaSain=Alfalfa sainfoin; Palfa= Pure Alfalfa; AlfaAlfasure=Alfalfa Alfasure)					Per-ASV Abundance Summaries for each group (Diet x Bloat combination)
ASV_ID	p.value	p.value.FDR (Benjamini-Hochberg)	Compairison (paired-Wilcoxon signed-rank test) (B:Bloated; NB: non-bloated)		Group	ASV_ID	mean	sd	median	min	max	IQR	Prevalence
Anaeromyces sp	0.792208	1	AlfaSainB_NB (not paired)		AlfalfaSainfoin.B	Anaeromyces sp	0.509524	0.5551	0.364286	0	1.4	0.742857	83.3333
Anaeromyces sp	0.00390625	0.00737847	Baseline_AlfaAlfasureNB		AlfalfaSainfoin.NB	Anaeromyces sp	0.388571	0.412484	0.428571	0	1.01429	0.442857	80
Anaeromyces sp	0.0625	0.0692935	Baseline_AlfaSainB		Basline.NB	Anaeromyces sp	0.00952381	0.0246183	0	0	0.0857143	0.00357143	25
Anaeromyces sp	0.125	0.159375	Baseline_AlfaSainNB		AlfalfaAlfasure.NB	Anaeromyces sp	0.397143	0.452747	0.235714	0	1.3	0.192857	90
Anaeromyces sp	0.00488281	0.00579124	Baseline_PAlfaB		PureAlfalfa.B	Anaeromyces sp	0.327273	0.346142	0.3	0	1.2	0.371429	72.7273
Buwchfawromyces eastonii	0.030303	0.772727	AlfaSainB_NB (not paired)		AlfalfaSainfoin.B	Buwchfawromyces eastonii	0.245238	0.316152	0.0571429	0.0428571	0.8	0.3	100
Buwchfawromyces eastonii	0.0273438	0.0332031	Baseline_AlfaAlfasureNB		AlfalfaSainfoin.NB	Buwchfawromyces eastonii	1.25714	0.945181	1.44286	0.0571429	2.28571	1.44286	100
Buwchfawromyces eastonii	0.03125	0.0419408	Baseline_AlfaSainB		AlfalfaAlfasure.NB	Buwchfawromyces eastonii	0.442857	0.63774	0.0428571	0	1.6	0.792857	70
Buwchfawromyces eastonii	0.0625	0.102823	Baseline_AlfaSainNB		Basline.NB	Buwchfawromyces eastonii	0.00119048	0.00412393	0	0	0.0142857	0	8.33333
Buwchfawromyces eastonii	0.00292969	0.00355748	Baseline_PAlfaB		PureAlfalfa.B	Buwchfawromyces eastonii	0.702597	0.862692	0.4	0	2.71429	1.03571	81.8182
Caecomyces communis	0.792208	1	AlfaSainB_NB (not paired)		AlfalfaSainfoin.B	Caecomyces communis	8.44762	8.07447	6.17857	0.942857	23.6714	5.25357	100
Caecomyces communis	0.00195312	0.0047433	Baseline_AlfaAlfasureNB		AlfalfaAlfasure.NB	Caecomyces communis	12.2471	4.39185	13.5929	6.44286	17.1857	8.33929	100
Caecomyces communis	0.03125	0.0419408	Baseline_AlfaSainB		PureAlfalfa.B	Caecomyces communis	8.61688	3.46612	9.21429	2.7	13.8714	4.24286	100
Caecomyces communis	0.0625	0.102823	Baseline_AlfaSainNB		AlfalfaSainfoin.NB	Caecomyces communis	7.97143	7.37545	3.45714	2.42857	18.6143	10.3	100
Caecomyces communis	0.000976562	0.0016066	Baseline_PAlfaB		Basline.NB	Caecomyces communis	1.76786	1.21485	1.32143	0.385714	4.11429	1.34286	100
Caecomyces communis.1	0.662338	1	AlfaSainB_NB (not paired)		AlfalfaAlfasure.NB	Caecomyces communis.1	8.33	3.34406	7.65	4.94286	16	3.63214	100
Caecomyces communis.1	0.00195312	0.0047433	Baseline_AlfaAlfasureNB		PureAlfalfa.B	Caecomyces communis.1	5.77532	2.54565	5.17143	2.18571	9.5	3.83571	100
Caecomyces communis.1	0.0625	0.0692935	Baseline_AlfaSainB		AlfalfaSainfoin.B	Caecomyces communis.1	5.29048	3.54312	5.00714	0.642857	11	3.16786	100
Caecomyces communis.1	0.3125	0.346467	Baseline_AlfaSainNB		AlfalfaSainfoin.NB	Caecomyces communis.1	4.57429	5.66512	2.35714	0.942857	14.4714	2.87143	100
Caecomyces communis.1	0.000976562	0.0016066	Baseline_PAlfaB		Basline.NB	Caecomyces communis.1	1.17738	0.763826	0.9	0.528571	2.98571	0.767857	100
Caecomyces communis.10	0.662338	1	AlfaSainB_NB (not paired)		AlfalfaAlfasure.NB	Caecomyces communis.10	1.32429	0.788956	1.25	0.314286	2.91429	1.09643	100
Caecomyces communis.10	0.00195312	0.0047433	Baseline_AlfaAlfasureNB		AlfalfaSainfoin.NB	Caecomyces communis.10	0.582857	0.319662	0.542857	0.2	0.985714	0.442857	100
Caecomyces communis.10	0.0625	0.0692935	Baseline_AlfaSainB		Basline.NB	Caecomyces communis.10	0.207143	0.103106	0.2	0.0428571	0.414286	0.0642857	100
Caecomyces communis.10	0.125	0.159375	Baseline_AlfaSainNB		PureAlfalfa.B	Caecomyces communis.10	0.54026	0.58529	0.442857	0.0285714	2.18571	0.307143	100
Caecomyces communis.10	0.0322266	0.0342407	Baseline_PAlfaB		AlfalfaSainfoin.B	Caecomyces communis.10	0.533333	0.300295	0.535714	0.1	1.01429	0.192857	100
Caecomyces communis.11	0.536797	1	AlfaSainB_NB (not paired)		AlfalfaSainfoin.NB	Caecomyces communis.11	0.665714	0.354361	0.742857	0.0714286	1	0.171429	100
Caecomyces communis.11	0.00195312	0.0047433	Baseline_AlfaAlfasureNB		Basline.NB	Caecomyces communis.11	0.0630952	0.0628507	0.05	0	0.171429	0.0964286	75
Caecomyces communis.11	0.03125	0.0419408	Baseline_AlfaSainB		AlfalfaSainfoin.B	Caecomyces communis.11	1.16905	0.914884	1.09286	0.1	2.52857	1.21071	100
Caecomyces communis.11	0.0625	0.102823	Baseline_AlfaSainNB		AlfalfaAlfasure.NB	Caecomyces communis.11	0.65	0.561148	0.492857	0.0285714	1.81429	0.592857	100
Caecomyces communis.11	0.00195312	0.00255409	Baseline_PAlfaB		PureAlfalfa.B	Caecomyces communis.11	0.725974	0.504301	0.7	0.0285714	1.45714	0.857143	100
Caecomyces communis.14	0.329004	1	AlfaSainB_NB (not paired)		AlfalfaAlfasure.NB	Caecomyces communis.14	0.234286	0.188104	0.171429	0.0571429	0.671429	0.164286	100
Caecomyces communis.14	0.160156	0.170166	Baseline_AlfaAlfasureNB		Basline.NB	Caecomyces communis.14	0.405952	0.442939	0.242857	0.0571429	1.44286	0.389286	100
Caecomyces communis.14	0.03125	0.0419408	Baseline_AlfaSainB		PureAlfalfa.B	Caecomyces communis.14	0.074026	0.0690514	0.0714286	0	0.242857	0.0714286	81.8182
Caecomyces communis.14	0.0625	0.102823	Baseline_AlfaSainNB		AlfalfaSainfoin.B	Caecomyces communis.14	0.0880952	0.0647864	0.0714286	0.0285714	0.214286	0.0214286	100
Caecomyces communis.14	0.00195312	0.00255409	Baseline_PAlfaB		AlfalfaSainfoin.NB	Caecomyces communis.14	0.1	0.176993	0.0142857	0	0.414286	0.0428571	80
Caecomyces communis.16	0.662338	1	AlfaSainB_NB (not paired)		AlfalfaSainfoin.B	Caecomyces communis.16	0.202381	0.14183	0.192857	0.0142857	0.414286	0.153571	100
Caecomyces communis.16	0.00195312	0.0047433	Baseline_AlfaAlfasureNB		AlfalfaSainfoin.NB	Caecomyces communis.16	0.231429	0.325043	0.0714286	0	0.785714	0.214286	80
Caecomyces communis.16	0.09375	0.0975765	Baseline_AlfaSainB		AlfalfaAlfasure.NB	Caecomyces communis.16	0.285714	0.174834	0.25	0.0571429	0.7	0.139286	100
Caecomyces communis.16	0.1875	0.222384	Baseline_AlfaSainNB		Basline.NB	Caecomyces communis.16	0.0261905	0.0249923	0.0142857	0	0.0857143	0.0178571	83.3333
Caecomyces communis.16	0.000976562	0.0016066	Baseline_PAlfaB		PureAlfalfa.B	Caecomyces communis.16	0.24026	0.223955	0.185714	0.0428571	0.771429	0.264286	100
Caecomyces communis.18	0.662338	1	AlfaSainB_NB (not paired)		AlfalfaSainfoin.NB	Caecomyces communis.18	0.277143	0.398415	0.0714286	0.0285714	0.971429	0.2	100
Caecomyces communis.18	0.00976562	0.0138346	Baseline_AlfaAlfasureNB		Basline.NB	Caecomyces communis.18	0.0154762	0.0177159	0.0142857	0	0.0571429	0.0285714	58.3333
Caecomyces communis.18	0.03125	0.0419408	Baseline_AlfaSainB		PureAlfalfa.B	Caecomyces communis.18	0.158442	0.185764	0.114286	0.0142857	0.642857	0.2	100
Caecomyces communis.18	0.0625	0.102823	Baseline_AlfaSainNB		AlfalfaAlfasure.NB	Caecomyces communis.18	0.155714	0.194301	0.107143	0	0.628571	0.146429	80
Caecomyces communis.18	0.000976562	0.0016066	Baseline_PAlfaB		AlfalfaSainfoin.B	Caecomyces communis.18	0.128571	0.094329	0.107143	0.0285714	0.242857	0.153571	100
Caecomyces communis.19	0.536797	1	AlfaSainB_NB (not paired)		AlfalfaAlfasure.NB	Caecomyces communis.19	0.2	0.16078	0.164286	0.0285714	0.414286	0.3	100
Caecomyces communis.19	0.00390625	0.00737847	Baseline_AlfaAlfasureNB		AlfalfaSainfoin.NB	Caecomyces communis.19	0.122857	0.143783	0.0428571	0	0.3	0.242857	80
Caecomyces communis.19	0.09375	0.0975765	Baseline_AlfaSainB		Basline.NB	Caecomyces communis.19	0.0202381	0.0154804	0.0214286	0	0.0428571	0.0178571	75
Caecomyces communis.19	0.125	0.159375	Baseline_AlfaSainNB		PureAlfalfa.B	Caecomyces communis.19	0.120779	0.0824036	0.1	0	0.242857	0.128571	90.9091
Caecomyces communis.19	0.00195312	0.00255409	Baseline_PAlfaB		AlfalfaSainfoin.B	Caecomyces communis.19	0.130952	0.133529	0.0642857	0.0142857	0.328571	0.175	100
Caecomyces communis.2	0.662338	1	AlfaSainB_NB (not paired)		AlfalfaAlfasure.NB	Caecomyces communis.2	3.08429	3.21208	1.73571	0.0142857	10.2857	3.46786	100
Caecomyces communis.2	0.00195312	0.0047433	Baseline_AlfaAlfasureNB		PureAlfalfa.B	Caecomyces communis.2	3.70779	2.76447	3.68571	0.5	8.87143	3.67143	100
Caecomyces communis.2	0.03125	0.0419408	Baseline_AlfaSainB		AlfalfaSainfoin.B	Caecomyces communis.2	2.96429	1.28945	3.25714	0.714286	4.52857	0.864286	100
Caecomyces communis.2	0.0625	0.102823	Baseline_AlfaSainNB		AlfalfaSainfoin.NB	Caecomyces communis.2	3.94286	5.20578	2.58571	0.428571	13.0286	2.35714	100
Caecomyces communis.2	0.000976562	0.0016066	Baseline_PAlfaB		Basline.NB	Caecomyces communis.2	0.305952	0.334944	0.214286	0	0.971429	0.364286	91.6667
Caecomyces communis.3	0.0519481	0.838961	AlfaSainB_NB (not paired)		AlfalfaAlfasure.NB	Caecomyces communis.3	3.01143	2.40045	2.32143	0.585714	8.68571	2.66786	100
Caecomyces communis.3	0.00195312	0.0047433	Baseline_AlfaAlfasureNB		PureAlfalfa.B	Caecomyces communis.3	1.99481	1.83128	1.67143	0.628571	7.28571	0.7	100
Caecomyces communis.3	0.03125	0.0419408	Baseline_AlfaSainB		AlfalfaSainfoin.B	Caecomyces communis.3	1.8	1.05475	2.07857	0.428571	3.04286	1.475	100
Caecomyces communis.3	0.4375	0.464844	Baseline_AlfaSainNB		AlfalfaSainfoin.NB	Caecomyces communis.3	0.762857	0.792671	0.328571	0.0714286	1.95714	0.914286	100
Caecomyces communis.3	0.000976562	0.0016066	Baseline_PAlfaB		Basline.NB	Caecomyces communis.3	0.397619	0.284597	0.314286	0.0571429	1.01429	0.257143	100
Caecomyces communis.5	0.428571	1	AlfaSainB_NB (not paired)		AlfalfaSainfoin.NB	Caecomyces communis.5	5.24	4.47892	4.27143	0	11.4429	5.17143	80
Caecomyces communis.5	0.0839844	0.091132	Baseline_AlfaAlfasureNB		AlfalfaAlfasure.NB	Caecomyces communis.5	2.12143	3.21529	0.921429	0	10.1286	2.45714	60
Caecomyces communis.5	0.0625	0.0692935	Baseline_AlfaSainB		AlfalfaSainfoin.B	Caecomyces communis.5	6.10952	12.4411	1.23571	0	31.4143	2.14643	83.3333
Caecomyces communis.5	0.125	0.159375	Baseline_AlfaSainNB		Basline.NB	Caecomyces communis.5	0	0	0	0	0	0	0
Caecomyces communis.5	0.000976562	0.0016066	Baseline_PAlfaB		PureAlfalfa.B	Caecomyces communis.5	6.99481	16.0617	2	0	54.8429	2.97143	90.9091
Caecomyces communis.6	0.428571	1	AlfaSainB_NB (not paired)		AlfalfaAlfasure.NB	Caecomyces communis.6	2.08286	0.979606	1.8	0.985714	4.01429	1.45714	100
Caecomyces communis.6	0.00195312	0.0047433	Baseline_AlfaAlfasureNB		AlfalfaSainfoin.B	Caecomyces communis.6	1.42381	0.747003	1.25	0.642857	2.51429	1.075	100
Caecomyces communis.6	0.03125	0.0419408	Baseline_AlfaSainB		PureAlfalfa.B	Caecomyces communis.6	1.02987	0.867402	0.614286	0.114286	2.85714	1.02143	100
Caecomyces communis.6	0.0625	0.102823	Baseline_AlfaSainNB		AlfalfaSainfoin.NB	Caecomyces communis.6	0.848571	0.293918	0.871429	0.357143	1.11429	0.157143	100
Caecomyces communis.6	0.123047	0.125508	Baseline_PAlfaB		Basline.NB	Caecomyces communis.6	0.440476	0.163772	0.428571	0.1	0.671429	0.228571	100
Caecomyces communis.7	0.792208	1	AlfaSainB_NB (not paired)		AlfalfaAlfasure.NB	Caecomyces communis.7	0.752857	0.575503	0.678571	0.185714	1.98571	0.614286	100
Caecomyces communis.7	0.00585938	0.0103044	Baseline_AlfaAlfasureNB		AlfalfaSainfoin.NB	Caecomyces communis.7	0.408571	0.416815	0.128571	0.1	1	0.585714	100
Caecomyces communis.7	0.03125	0.0419408	Baseline_AlfaSainB		Basline.NB	Caecomyces communis.7	1.27143	0.662373	1.19286	0.471429	2.44286	0.932143	100
Caecomyces communis.7	0.0625	0.102823	Baseline_AlfaSainNB		PureAlfalfa.B	Caecomyces communis.7	0.287013	0.309209	0.271429	0.0571429	1.15714	0.221429	100
Caecomyces communis.7	0.00195312	0.00255409	Baseline_PAlfaB		AlfalfaSainfoin.B	Caecomyces communis.7	0.242857	0.12189	0.235714	0.114286	0.428571	0.164286	100
Caecomyces communis.9	0.930736	1	AlfaSainB_NB (not paired)		AlfalfaAlfasure.NB	Caecomyces communis.9	0.737143	0.490185	0.6	0.0857143	1.9	0.203571	100
Caecomyces communis.9	0.0371094	0.0420573	Baseline_AlfaAlfasureNB		AlfalfaSainfoin.B	Caecomyces communis.9	0.233333	0.0661888	0.25	0.128571	0.314286	0.0678571	100
Caecomyces communis.9	0.03125	0.0419408	Baseline_AlfaSainB		PureAlfalfa.B	Caecomyces communis.9	0.196104	0.0987867	0.185714	0.0428571	0.4	0.0857143	100
Caecomyces communis.9	0.0625	0.102823	Baseline_AlfaSainNB		AlfalfaSainfoin.NB	Caecomyces communis.9	0.34	0.356914	0.142857	0.0428571	0.914286	0.314286	100
Caecomyces communis.9	0.00195312	0.00255409	Baseline_PAlfaB		Basline.NB	Caecomyces communis.9	0.913095	0.428764	0.992857	0.157143	1.6	0.357143	100
Cyllamyces aberensis	1	1	AlfaSainB_NB (not paired)		AlfalfaSainfoin.B	Cyllamyces aberensis	8.06905	9.4647	6.3	0.114286	24.4	10.375	100
Cyllamyces aberensis	0.0273438	0.0332031	Baseline_AlfaAlfasureNB		AlfalfaSainfoin.NB	Cyllamyces aberensis	7.26571	9.27078	4.5	0.142857	22.6143	8.35714	100
Cyllamyces aberensis	0.03125	0.0419408	Baseline_AlfaSainB		Basline.NB	Cyllamyces aberensis	0.511905	0.604922	0.421429	0	1.91429	0.625	75
Cyllamyces aberensis	0.125	0.159375	Baseline_AlfaSainNB		AlfalfaAlfasure.NB	Cyllamyces aberensis	3.53571	3.77759	2.19286	0	9.98571	6.19643	80
Cyllamyces aberensis	0.000976562	0.0016066	Baseline_PAlfaB		PureAlfalfa.B	Cyllamyces aberensis	12.1117	12.1355	6.04286	0.314286	31.5	21.9929	100
Cyllamyces aberensis.1	0.930736	1	AlfaSainB_NB (not paired)		AlfalfaSainfoin.B	Cyllamyces aberensis.1	4.21429	4.79205	3.4	0.0142857	12.4857	5.33214	100
Cyllamyces aberensis.1	0.0273438	0.0332031	Baseline_AlfaAlfasureNB		AlfalfaSainfoin.NB	Cyllamyces aberensis.1	3.81714	3.10187	4.2	0.0571429	8.35714	2.41429	100
Cyllamyces aberensis.1	0.03125	0.0419408	Baseline_AlfaSainB		Basline.NB	Cyllamyces aberensis.1	0.263095	0.314667	0.2	0	0.928571	0.257143	66.6667
Cyllamyces aberensis.1	0.0625	0.102823	Baseline_AlfaSainNB		AlfalfaAlfasure.NB	Cyllamyces aberensis.1	1.94571	2.10156	0.885714	0	5.64286	3.29643	80
Cyllamyces aberensis.1	0.000976562	0.0016066	Baseline_PAlfaB		PureAlfalfa.B	Cyllamyces aberensis.1	6.05584	5.7171	3.41429	0.114286	14.8	10.1	100
Neocallimastix frontalis	0.930736	1	AlfaSainB_NB (not paired)		AlfalfaSainfoin.B	Neocallimastix frontalis	5.55	2.35503	6.13571	2.28571	8.21429	3.22857	100
Neocallimastix frontalis	0.00195312	0.0047433	Baseline_AlfaAlfasureNB		AlfalfaSainfoin.NB	Neocallimastix frontalis	4.47143	2.07239	4.5	1.57143	6.52857	2.9	100
Neocallimastix frontalis	0.03125	0.0419408	Baseline_AlfaSainB		AlfalfaAlfasure.NB	Neocallimastix frontalis	10.4143	4.06405	9.72857	5.25714	16.7857	6.78929	100
Neocallimastix frontalis	0.0625	0.102823	Baseline_AlfaSainNB		Basline.NB	Neocallimastix frontalis	15.4345	3.79219	14.9714	9.18571	20.7286	6.05714	100
Neocallimastix frontalis	0.000976562	0.0016066	Baseline_PAlfaB		PureAlfalfa.B	Neocallimastix frontalis	4.45455	2.36684	3.55714	1.68571	9.54286	2.31429	100
Neocallimastix frontalis.1	0.930736	1	AlfaSainB_NB (not paired)		AlfalfaSainfoin.B	Neocallimastix frontalis.1	0.285714	0.319694	0.2	0.0285714	0.914286	0.135714	100
Neocallimastix frontalis.1	0.00976562	0.0138346	Baseline_AlfaAlfasureNB		AlfalfaSainfoin.NB	Neocallimastix frontalis.1	0.242857	0.222234	0.3	0.0142857	0.557143	0.257143	100
Neocallimastix frontalis.1	0.03125	0.0419408	Baseline_AlfaSainB		Basline.NB	Neocallimastix frontalis.1	0.552381	0.270253	0.514286	0.142857	1.15714	0.296429	100
Neocallimastix frontalis.1	0.0625	0.102823	Baseline_AlfaSainNB		PureAlfalfa.B	Neocallimastix frontalis.1	0.227273	0.187405	0.2	0.0142857	0.614286	0.3	100
Neocallimastix frontalis.1	0.000976562	0.0016066	Baseline_PAlfaB		AlfalfaAlfasure.NB	Neocallimastix frontalis.1	0.457143	0.21884	0.428571	0.128571	0.8	0.332143	100
Neocallimastix frontalis.6	0.0822511	0.838961	AlfaSainB_NB (not paired)		AlfalfaSainfoin.NB	Neocallimastix frontalis.6	0.111429	0.151658	0.0428571	0	0.357143	0.157143	60
Neocallimastix frontalis.6	0.0195312	0.0255409	Baseline_AlfaAlfasureNB		Basline.NB	Neocallimastix frontalis.6	0.0654762	0.118503	0.0142857	0	0.414286	0.0714286	66.6667
Neocallimastix frontalis.6	0.03125	0.0419408	Baseline_AlfaSainB		AlfalfaAlfasure.NB	Neocallimastix frontalis.6	0.0342857	0.0706946	0	0	0.228571	0.0392857	40
Neocallimastix frontalis.6	0.8125	0.8125	Baseline_AlfaSainNB		AlfalfaSainfoin.B	Neocallimastix frontalis.6	0.00238095	0.00583212	0	0	0.0142857	0	16.6667
Neocallimastix frontalis.6	0.000976562	0.0016066	Baseline_PAlfaB		PureAlfalfa.B	Neocallimastix frontalis.6	0.00909091	0.0172292	0	0	0.0571429	0.0142857	36.3636
Neocallimastix frontalis.7	0.0822511	0.838961	AlfaSainB_NB (not paired)		AlfalfaSainfoin.NB	Neocallimastix frontalis.7	0.0257143	0.0211891	0.0285714	0	0.0571429	0.0142857	80
Neocallimastix frontalis.7	0.0371094	0.0420573	Baseline_AlfaAlfasureNB		Basline.NB	Neocallimastix frontalis.7	0.0571429	0.0479641	0.05	0	0.157143	0.0464286	91.6667
Neocallimastix frontalis.7	0.03125	0.0419408	Baseline_AlfaSainB		AlfalfaAlfasure.NB	Neocallimastix frontalis.7	0.0214286	0.0193429	0.0142857	0	0.0571429	0.0214286	80
Neocallimastix frontalis.7	0.125	0.159375	Baseline_AlfaSainNB		AlfalfaSainfoin.B	Neocallimastix frontalis.7	0.00952381	0.0173009	0	0	0.0428571	0.0107143	33.3333
Neocallimastix frontalis.7	0.000976562	0.0016066	Baseline_PAlfaB		PureAlfalfa.B	Neocallimastix frontalis.7	0.0142857	0.0169031	0.0142857	0	0.0428571	0.0214286	54.5455
Neocallimastix sp	0.428571	1	AlfaSainB_NB (not paired)		AlfalfaAlfasure.NB	Neocallimastix sp	2.33286	1.4264	2.35	0.357143	5.14286	1.69643	100
Neocallimastix sp	0.00195312	0.0047433	Baseline_AlfaAlfasureNB		AlfalfaSainfoin.B	Neocallimastix sp	1.37619	0.908853	0.985714	0.828571	3.18571	0.410714	100
Neocallimastix sp	0.03125	0.0419408	Baseline_AlfaSainB		PureAlfalfa.B	Neocallimastix sp	0.824675	0.472557	0.742857	0.4	2.1	0.392857	100
Neocallimastix sp	0.0625	0.102823	Baseline_AlfaSainNB		AlfalfaSainfoin.NB	Neocallimastix sp	0.834286	0.556006	0.7	0.257143	1.58571	0.8	100
Neocallimastix sp	0.000976562	0.0016066	Baseline_PAlfaB		Basline.NB	Neocallimastix sp	3.4369	1.46183	3.65714	1.27143	6.22857	1.66071	100
Neocallimastix sp.2	0.662338	1	AlfaSainB_NB (not paired)		AlfalfaSainfoin.NB	Neocallimastix sp.2	0.522857	0.284748	0.414286	0.228571	0.942857	0.314286	100
Neocallimastix sp.2	0.00390625	0.00737847	Baseline_AlfaAlfasureNB		Basline.NB	Neocallimastix sp.2	1.68452	0.614224	1.53571	0.957143	2.81429	0.889286	100
Neocallimastix sp.2	0.03125	0.0419408	Baseline_AlfaSainB		AlfalfaSainfoin.B	Neocallimastix sp.2	0.435714	0.20056	0.378571	0.271429	0.8	0.192857	100
Neocallimastix sp.2	0.0625	0.102823	Baseline_AlfaSainNB		AlfalfaAlfasure.NB	Neocallimastix sp.2	0.968571	0.468064	0.757143	0.514286	1.85714	0.7	100
Neocallimastix sp.2	0.000976562	0.0016066	Baseline_PAlfaB		PureAlfalfa.B	Neocallimastix sp.2	0.412987	0.217824	0.371429	0.185714	0.9	0.185714	100
Neocallimastix sp.4	0.930736	1	AlfaSainB_NB (not paired)		AlfalfaSainfoin.B	Neocallimastix sp.4	0.228571	0.222417	0.15	0.0142857	0.571429	0.296429	100
Neocallimastix sp.4	0.0371094	0.0420573	Baseline_AlfaAlfasureNB		AlfalfaSainfoin.NB	Neocallimastix sp.4	0.194286	0.0972059	0.185714	0.0714286	0.342857	0.0285714	100
Neocallimastix sp.4	0.03125	0.0419408	Baseline_AlfaSainB		AlfalfaAlfasure.NB	Neocallimastix sp.4	0.327143	0.264571	0.242857	0.0857143	0.971429	0.225	100
Neocallimastix sp.4	0.0625	0.102823	Baseline_AlfaSainNB		Basline.NB	Neocallimastix sp.4	0.385714	0.241747	0.321429	0.142857	0.885714	0.160714	100
Neocallimastix sp.4	0.000976562	0.0016066	Baseline_PAlfaB		PureAlfalfa.B	Neocallimastix sp.4	0.179221	0.18029	0.114286	0.0428571	0.628571	0.164286	100
Neocallimastix sp.5	0.177489	1	AlfaSainB_NB (not paired)		AlfalfaAlfasure.NB	Neocallimastix sp.5	0.02	0.0180702	0.0142857	0	0.0428571	0.0357143	70
Neocallimastix sp.5	0.695312	0.695312	Baseline_AlfaAlfasureNB		AlfalfaSainfoin.B	Neocallimastix sp.5	0.0047619	0.00737711	0	0	0.0142857	0.0107143	33.3333
Neocallimastix sp.5	0.03125	0.0419408	Baseline_AlfaSainB		Basline.NB	Neocallimastix sp.5	0.0178571	0.0193829	0.0142857	0	0.0571429	0.0285714	58.3333
Neocallimastix sp.5	0.3125	0.346467	Baseline_AlfaSainNB		PureAlfalfa.B	Neocallimastix sp.5	0.0155844	0.0174433	0.0142857	0	0.0428571	0.0285714	54.5455
Neocallimastix sp.5	0.700195	0.700195	Baseline_PAlfaB		AlfalfaSainfoin.NB	Neocallimastix sp.5	0.0142857	0.0174964	0.0142857	0	0.0428571	0.0142857	60
Orpinomyces sp.11	0.930736	1	AlfaSainB_NB (not paired)		AlfalfaAlfasure.NB	Orpinomyces sp.11	0.0685714	0.11484	0.0428571	0	0.385714	0.0464286	70
Orpinomyces sp.11	0.0488281	0.0541355	Baseline_AlfaAlfasureNB		AlfalfaSainfoin.B	Orpinomyces sp.11	0.052381	0.0368856	0.05	0	0.1	0.0464286	83.3333
Orpinomyces sp.11	0.0625	0.0692935	Baseline_AlfaSainB		AlfalfaSainfoin.NB	Orpinomyces sp.11	0.0485714	0.0520988	0.0285714	0	0.128571	0.0571429	80
Orpinomyces sp.11	0.125	0.159375	Baseline_AlfaSainNB		Basline.NB	Orpinomyces sp.11	0.00714286	0.0142857	0	0	0.0428571	0.00357143	25
Orpinomyces sp.11	0.00195312	0.00255409	Baseline_PAlfaB		PureAlfalfa.B	Orpinomyces sp.11	0.123377	0.153234	0.0857143	0	0.528571	0.0428571	90.9091
Orpinomyces sp.12	0.246753	1	AlfaSainB_NB (not paired)		AlfalfaAlfasure.NB	Orpinomyces sp.12	0.0257143	0.0450749	0.00714286	0	0.142857	0.025	50
Orpinomyces sp.12	0.556641	0.567773	Baseline_AlfaAlfasureNB		AlfalfaSainfoin.NB	Orpinomyces sp.12	0.0142857	0.0319438	0	0	0.0714286	0	20
Orpinomyces sp.12	0.15625	0.159375	Baseline_AlfaSainB		Basline.NB	Orpinomyces sp.12	0.0119048	0.0170488	0	0	0.0428571	0.0178571	41.6667
Orpinomyces sp.12	0.4375	0.464844	Baseline_AlfaSainNB		PureAlfalfa.B	Orpinomyces sp.12	0.0675325	0.0862107	0.0142857	0	0.257143	0.0785714	81.8182
Orpinomyces sp.12	0.00683594	0.0077474	Baseline_PAlfaB		AlfalfaSainfoin.B	Orpinomyces sp.12	0.114286	0.110287	0.107143	0	0.271429	0.167857	66.6667
Orpinomyces sp.5	0.329004	1	AlfaSainB_NB (not paired)		AlfalfaSainfoin.B	Orpinomyces sp.5	4.93095	5.45369	2.51429	1.82857	15.8286	2.26071	100
Orpinomyces sp.5	0.00195312	0.0047433	Baseline_AlfaAlfasureNB		AlfalfaSainfoin.NB	Orpinomyces sp.5	2.02	1.7029	1.34286	0.0714286	4.27143	2.1	100
Orpinomyces sp.5	0.03125	0.0419408	Baseline_AlfaSainB		AlfalfaAlfasure.NB	Orpinomyces sp.5	4.36714	4.43769	2.43571	0.2	13.1286	6.25	100
Orpinomyces sp.5	0.0625	0.102823	Baseline_AlfaSainNB		Basline.NB	Orpinomyces sp.5	0.595238	0.863748	0.0928571	0	2.78571	0.932143	75
Orpinomyces sp.5	0.000976562	0.0016066	Baseline_PAlfaB		PureAlfalfa.B	Orpinomyces sp.5	5.63636	5.7132	3.71429	0.414286	16.7429	5.51429	100
Orpinomyces sp.6	0.246753	1	AlfaSainB_NB (not paired)		AlfalfaAlfasure.NB	Orpinomyces sp.6	2.51857	2.23797	1.77143	0.128571	6.85714	3.18929	100
Orpinomyces sp.6	0.00390625	0.00737847	Baseline_AlfaAlfasureNB		PureAlfalfa.B	Orpinomyces sp.6	4.02208	3.94648	3.14286	0.328571	14.2	1.35714	100
Orpinomyces sp.6	0.03125	0.0419408	Baseline_AlfaSainB		AlfalfaSainfoin.B	Orpinomyces sp.6	2.85	1.67397	2.86429	1.11429	5.55714	1.98571	100
Orpinomyces sp.6	0.1875	0.222384	Baseline_AlfaSainNB		AlfalfaSainfoin.NB	Orpinomyces sp.6	1.50857	0.727913	1.7	0.485714	2.28571	0.928571	100
Orpinomyces sp.6	0.000976562	0.0016066	Baseline_PAlfaB		Basline.NB	Orpinomyces sp.6	0.505952	0.795755	0.114286	0	2.47143	0.560714	83.3333
Orpinomyces sp.8	0.536797	1	AlfaSainB_NB (not paired)		AlfalfaSainfoin.B	Orpinomyces sp.8	0.661905	0.97999	0.292857	0.0714286	2.62857	0.360714	100
Orpinomyces sp.8	0.00390625	0.00737847	Baseline_AlfaAlfasureNB		AlfalfaAlfasure.NB	Orpinomyces sp.8	0.605714	0.809585	0.114286	0	2.35714	1.06786	90
Orpinomyces sp.8	0.03125	0.0419408	Baseline_AlfaSainB		AlfalfaSainfoin.NB	Orpinomyces sp.8	0.642857	0.443203	0.757143	0.0142857	1.17143	0.442857	100
Orpinomyces sp.8	0.0625	0.102823	Baseline_AlfaSainNB		Basline.NB	Orpinomyces sp.8	0.077381	0.144338	0	0	0.371429	0.05	41.6667
Orpinomyces sp.8	0.000976562	0.0016066	Baseline_PAlfaB		PureAlfalfa.B	Orpinomyces sp.8	1.14805	1.33154	0.457143	0.0285714	3.38571	1.99286	100
Orpinomyces sp.9	0.030303	0.772727	AlfaSainB_NB (not paired)		AlfalfaAlfasure.NB	Orpinomyces sp.9	0.452857	0.542776	0.25	0	1.7	0.471429	90
Orpinomyces sp.9	0.00976562	0.0138346	Baseline_AlfaAlfasureNB		AlfalfaSainfoin.B	Orpinomyces sp.9	0.852381	0.623268	0.914286	0.0714286	1.47143	1.03571	100
Orpinomyces sp.9	0.03125	0.0419408	Baseline_AlfaSainB		AlfalfaSainfoin.NB	Orpinomyces sp.9	0.0971429	0.139752	0.0428571	0	0.342857	0.0428571	80
Orpinomyces sp.9	0.625	0.6375	Baseline_AlfaSainNB		PureAlfalfa.B	Orpinomyces sp.9	0.661039	0.63824	0.428571	0.0285714	2.05714	0.707143	100
Orpinomyces sp.9	0.000976562	0.0016066	Baseline_PAlfaB		Basline.NB	Orpinomyces sp.9	0.0845238	0.170719	0.0142857	0	0.514286	0.0321429	58.3333
Piromyces sp.10	0.662338	1	AlfaSainB_NB (not paired)		AlfalfaSainfoin.NB	Piromyces sp.10	0.0828571	0.0467298	0.0714286	0.0285714	0.157143	0.0142857	100
Piromyces sp.10	0.00195312	0.0047433	Baseline_AlfaAlfasureNB		Basline.NB	Piromyces sp.10	1.36667	1.64438	0.4	0.0857143	5.25714	2.17857	100
Piromyces sp.10	0.03125	0.0419408	Baseline_AlfaSainB		PureAlfalfa.B	Piromyces sp.10	0.0935065	0.173601	0.0285714	0	0.6	0.0642857	81.8182
Piromyces sp.10	0.0625	0.102823	Baseline_AlfaSainNB		AlfalfaAlfasure.NB	Piromyces sp.10	0.14	0.208308	0.0714286	0.0142857	0.7	0.146429	100
Piromyces sp.10	0.000976562	0.0016066	Baseline_PAlfaB		AlfalfaSainfoin.B	Piromyces sp.10	0.12619	0.175991	0.0571429	0	0.457143	0.146429	66.6667
Piromyces sp.12	1	1	AlfaSainB_NB (not paired)		AlfalfaAlfasure.NB	Piromyces sp.12	0.164286	0.164716	0.135714	0.0142857	0.542857	0.210714	100
Piromyces sp.12	0.00195312	0.0047433	Baseline_AlfaAlfasureNB		AlfalfaSainfoin.B	Piromyces sp.12	0.0880952	0.076354	0.0857143	0	0.185714	0.121429	83.3333
Piromyces sp.12	0.03125	0.0419408	Baseline_AlfaSainB		AlfalfaSainfoin.NB	Piromyces sp.12	0.451429	0.906361	0.0571429	0	2.07143	0.0714286	80
Piromyces sp.12	0.0625	0.102823	Baseline_AlfaSainNB		PureAlfalfa.B	Piromyces sp.12	0.0987013	0.109629	0.0714286	0	0.342857	0.0571429	81.8182
Piromyces sp.12	0.000976562	0.0016066	Baseline_PAlfaB		Basline.NB	Piromyces sp.12	1.2619	1.48955	0.621429	0.1	5.05714	1.38929	100
Piromyces sp.15	0.792208	1	AlfaSainB_NB (not paired)		AlfalfaSainfoin.B	Piromyces sp.15	0.780952	0.528121	0.75	0.185714	1.35714	0.914286	100
Piromyces sp.15	0.00976562	0.0138346	Baseline_AlfaAlfasureNB		AlfalfaSainfoin.NB	Piromyces sp.15	0.605714	0.531805	0.5	0.0428571	1.21429	0.928571	100
Piromyces sp.15	0.0625	0.0692935	Baseline_AlfaSainB		Basline.NB	Piromyces sp.15	0.111905	0.151655	0.0285714	0	0.371429	0.185714	75
Piromyces sp.15	0.0625	0.102823	Baseline_AlfaSainNB		AlfalfaAlfasure.NB	Piromyces sp.15	0.92	0.622343	0.792857	0.0571429	2.08571	0.596429	100
Piromyces sp.15	0.00976562	0.0108271	Baseline_PAlfaB		PureAlfalfa.B	Piromyces sp.15	0.302597	0.196896	0.271429	0.0571429	0.671429	0.192857	100
Piromyces sp.19	0.428571	1	AlfaSainB_NB (not paired)		Basline.NB	Piromyces sp.19	0.286905	0.761418	0.0714286	0	2.7	0.05	83.3333
Piromyces sp.19	0.00195312	0.0047433	Baseline_AlfaAlfasureNB		AlfalfaAlfasure.NB	Piromyces sp.19	0.0242857	0.049966	0	0	0.157143	0.0142857	40
Piromyces sp.19	0.03125	0.0419408	Baseline_AlfaSainB		AlfalfaSainfoin.B	Piromyces sp.19	0.0261905	0.0262121	0.0142857	0	0.0714286	0.0214286	83.3333
Piromyces sp.19	0.0625	0.102823	Baseline_AlfaSainNB		AlfalfaSainfoin.NB	Piromyces sp.19	0.428571	0.958315	0	0	2.14286	0	20
Piromyces sp.19	0.000976562	0.0016066	Baseline_PAlfaB		PureAlfalfa.B	Piromyces sp.19	0.0207792	0.0462308	0	0	0.157143	0.0142857	45.4545
Piromyces sp.2	1	1	AlfaSainB_NB (not paired)		AlfalfaSainfoin.B	Piromyces sp.2	0.628571	0.378288	0.592857	0.2	1.27143	0.346429	100
Piromyces sp.2	0.00195312	0.0047433	Baseline_AlfaAlfasureNB		AlfalfaSainfoin.NB	Piromyces sp.2	0.611429	0.525512	0.457143	0.242857	1.52857	0.228571	100
Piromyces sp.2	0.03125	0.0419408	Baseline_AlfaSainB		Basline.NB	Piromyces sp.2	5.79286	3.90407	4.63571	1.54286	15.0286	3.47143	100
Piromyces sp.2	0.0625	0.102823	Baseline_AlfaSainNB		AlfalfaAlfasure.NB	Piromyces sp.2	0.558571	0.306798	0.442857	0.0714286	1.02857	0.382143	100
Piromyces sp.2	0.000976562	0.0016066	Baseline_PAlfaB		PureAlfalfa.B	Piromyces sp.2	0.549351	0.557596	0.428571	0.128571	2	0.5	100
Piromyces sp.20	0.930736	1	AlfaSainB_NB (not paired)		AlfalfaSainfoin.B	Piromyces sp.20	0.052381	0.0643122	0.0357143	0	0.171429	0.0571429	66.6667
Piromyces sp.20	0.00976562	0.0138346	Baseline_AlfaAlfasureNB		AlfalfaSainfoin.NB	Piromyces sp.20	0.0314286	0.0456249	0	0	0.1	0.0571429	40
Piromyces sp.20	0.03125	0.0419408	Baseline_AlfaSainB		AlfalfaAlfasure.NB	Piromyces sp.20	0.0314286	0.0385685	0.0214286	0	0.114286	0.05	60
Piromyces sp.20	0.625	0.6375	Baseline_AlfaSainNB		Basline.NB	Piromyces sp.20	0.207143	0.291404	0.121429	0	0.985714	0.182143	83.3333
Piromyces sp.20	0.00292969	0.00355748	Baseline_PAlfaB		PureAlfalfa.B	Piromyces sp.20	0.0233766	0.0420266	0.0142857	0	0.142857	0.0214286	54.5455
Piromyces sp.21	0.428571	1	AlfaSainB_NB (not paired)		AlfalfaSainfoin.B	Piromyces sp.21	0.0428571	0.0722806	0.0142857	0	0.185714	0.0392857	50
Piromyces sp.21	0.00585938	0.0103044	Baseline_AlfaAlfasureNB		AlfalfaAlfasure.NB	Piromyces sp.21	0.0371429	0.037616	0.0214286	0	0.1	0.0392857	80
Piromyces sp.21	0.03125	0.0419408	Baseline_AlfaSainB		AlfalfaSainfoin.NB	Piromyces sp.21	0.06	0.0702764	0.0285714	0	0.171429	0.0714286	80
Piromyces sp.21	0.125	0.159375	Baseline_AlfaSainNB		Basline.NB	Piromyces sp.21	0.258333	0.277843	0.192857	0	0.9	0.357143	83.3333
Piromyces sp.21	0.00195312	0.00255409	Baseline_PAlfaB		PureAlfalfa.B	Piromyces sp.21	0.0168831	0.0228734	0.0142857	0	0.0714286	0.0214286	54.5455
Piromyces sp.30	0.428571	1	AlfaSainB_NB (not paired)		AlfalfaAlfasure.NB	Piromyces sp.30	0	0	0	0	0	0	0
Piromyces sp.30	0.00195312	0.0047433	Baseline_AlfaAlfasureNB		Basline.NB	Piromyces sp.30	0.0202381	0.0288675	0.0142857	0	0.0857143	0.0178571	58.3333
Piromyces sp.30	0.03125	0.0419408	Baseline_AlfaSainB		PureAlfalfa.B	Piromyces sp.30	0.0025974	0.00861461	0	0	0.0285714	0	9.09091
Piromyces sp.30	0.1875	0.222384	Baseline_AlfaSainNB		AlfalfaSainfoin.B	Piromyces sp.30	0.0047619	0.0116642	0	0	0.0285714	0	16.6667
Piromyces sp.30	0.0322266	0.0342407	Baseline_PAlfaB		AlfalfaSainfoin.NB	Piromyces sp.30	0	0	0	0	0	0	0
Piromyces sp.4	0.536797	1	AlfaSainB_NB (not paired)		AlfalfaSainfoin.B	Piromyces sp.4	0.6	0.366339	0.521429	0.3	1.28571	0.289286	100
Piromyces sp.4	0.00195312	0.0047433	Baseline_AlfaAlfasureNB		AlfalfaAlfasure.NB	Piromyces sp.4	0.454286	0.322814	0.407143	0.114286	0.942857	0.517857	100
Piromyces sp.4	0.03125	0.0419408	Baseline_AlfaSainB		PureAlfalfa.B	Piromyces sp.4	0.432468	0.477412	0.271429	0	1.37143	0.428571	90.9091
Piromyces sp.4	0.125	0.159375	Baseline_AlfaSainNB		AlfalfaSainfoin.NB	Piromyces sp.4	0.491429	0.592177	0.142857	0.0285714	1.27143	0.957143	100
Piromyces sp.4	0.000976562	0.0016066	Baseline_PAlfaB		Basline.NB	Piromyces sp.4	4.31071	3.29292	4.97857	0.385714	7.94286	6.525	100
Piromyces sp.5	0.792208	1	AlfaSainB_NB (not paired)		AlfalfaSainfoin.B	Piromyces sp.5	0.052381	0.0726561	0.0285714	0	0.185714	0.0678571	50
Piromyces sp.5	0.00976562	0.0138346	Baseline_AlfaAlfasureNB		AlfalfaSainfoin.NB	Piromyces sp.5	0.0828571	0.177396	0	0	0.4	0.0142857	40
Piromyces sp.5	0.03125	0.0419408	Baseline_AlfaSainB		Basline.NB	Piromyces sp.5	3.21429	4.75603	1.25714	0	12.9857	3.55	83.3333
Piromyces sp.5	0.0625	0.102823	Baseline_AlfaSainNB		AlfalfaAlfasure.NB	Piromyces sp.5	0.105714	0.199341	0.0285714	0	0.657143	0.0785714	80
Piromyces sp.5	0.00683594	0.0077474	Baseline_PAlfaB		PureAlfalfa.B	Piromyces sp.5	0.0623377	0.0990306	0.0285714	0	0.328571	0.0714286	63.6364
Piromyces sp.6	0.792208	1	AlfaSainB_NB (not paired)		AlfalfaSainfoin.B	Piromyces sp.6	0.142857	0.123222	0.1	0.0428571	0.385714	0.0428571	100
Piromyces sp.6	0.00195312	0.0047433	Baseline_AlfaAlfasureNB		AlfalfaAlfasure.NB	Piromyces sp.6	0.17	0.1275	0.164286	0	0.457143	0.103571	90
Piromyces sp.6	0.0625	0.0692935	Baseline_AlfaSainB		AlfalfaSainfoin.NB	Piromyces sp.6	0.962857	1.8543	0.157143	0	4.27143	0.3	80
Piromyces sp.6	0.0625	0.102823	Baseline_AlfaSainNB		Basline.NB	Piromyces sp.6	2.12024	3.57382	0.6	0.2	12.5286	1.21786	100
Piromyces sp.6	0.000976562	0.0016066	Baseline_PAlfaB		PureAlfalfa.B	Piromyces sp.6	0.172727	0.223466	0.0714286	0.0142857	0.771429	0.171429	100
Piromyces sp.7	0.792208	1	AlfaSainB_NB (not paired)		AlfalfaSainfoin.NB	Piromyces sp.7	0.0457143	0.0583795	0.0428571	0	0.142857	0.0428571	60
Piromyces sp.7	0.00195312	0.0047433	Baseline_AlfaAlfasureNB		Basline.NB	Piromyces sp.7	1.61429	2.41776	0.85	0	8.37143	1.58929	91.6667
Piromyces sp.7	0.03125	0.0419408	Baseline_AlfaSainB		AlfalfaAlfasure.NB	Piromyces sp.7	0.0571429	0.0890871	0.0214286	0	0.242857	0.05	60
Piromyces sp.7	0.0625	0.102823	Baseline_AlfaSainNB		AlfalfaSainfoin.B	Piromyces sp.7	0.0785714	0.13902	0.0214286	0	0.357143	0.0571429	66.6667
Piromyces sp.7	0.000976562	0.0016066	Baseline_PAlfaB		PureAlfalfa.B	Piromyces sp.7	0.0792208	0.150015	0.0285714	0	0.514286	0.0785714	54.5455
Piromyces sp.9	0.329004	1	AlfaSainB_NB (not paired)		AlfalfaSainfoin.NB	Piromyces sp.9	1.13714	2.02647	0.2	0.142857	4.75714	0.242857	100
Piromyces sp.9	0.00976562	0.0138346	Baseline_AlfaAlfasureNB		Basline.NB	Piromyces sp.9	1.175	1.61348	0.707143	0.0285714	5.2	0.767857	100
Piromyces sp.9	1	1	Baseline_AlfaSainB		AlfalfaSainfoin.B	Piromyces sp.9	1.10952	1.19039	0.742857	0.228571	3.4	0.821429	100
Piromyces sp.9	0.3125	0.346467	Baseline_AlfaSainNB		AlfalfaAlfasure.NB	Piromyces sp.9	0.1	0.115862	0.0428571	0	0.271429	0.192857	80
Piromyces sp.9	0.0537109	0.0559032	Baseline_PAlfaB		PureAlfalfa.B	Piromyces sp.9	0.511688	1.0022	0.157143	0.0142857	3.44286	0.371429	100
Unclassified Neocallimastigaceae	0.662338	1	AlfaSainB_NB (not paired)		AlfalfaSainfoin.B	Unclassified Neocallimastigaceae	2.95714	1.63463	2.98571	1.12857	5.48571	2.01071	100
Unclassified Neocallimastigaceae	0.00195312	0.0047433	Baseline_AlfaAlfasureNB		AlfalfaSainfoin.NB	Unclassified Neocallimastigaceae	2.06857	1.0326	2.55714	0.4	2.94286	0.928571	100
Unclassified Neocallimastigaceae	0.03125	0.0419408	Baseline_AlfaSainB		Basline.NB	Unclassified Neocallimastigaceae	6.96548	1.58874	6.7	4.1	10.2429	1.39643	100
Unclassified Neocallimastigaceae	0.0625	0.102823	Baseline_AlfaSainNB		AlfalfaAlfasure.NB	Unclassified Neocallimastigaceae	4.87714	2.05485	5.25	1.4	7.28571	3.18214	100
Unclassified Neocallimastigaceae	0.000976562	0.0016066	Baseline_PAlfaB		PureAlfalfa.B	Unclassified Neocallimastigaceae	2.05325	1.11971	1.91429	0.928571	4.87143	0.842857	100
Unclassified Neocallimastigaceae.1	0.792208	1	AlfaSainB_NB (not paired)		AlfalfaSainfoin.B	Unclassified Neocallimastigaceae.1	1.3	0.755227	1.22857	0.471429	2.31429	1.13214	100
Unclassified Neocallimastigaceae.1	0.00390625	0.00737847	Baseline_AlfaAlfasureNB		AlfalfaSainfoin.NB	Unclassified Neocallimastigaceae.1	1.00857	0.55619	1.11429	0.128571	1.48571	0.6	100
Unclassified Neocallimastigaceae.1	0.03125	0.0419408	Baseline_AlfaSainB		AlfalfaAlfasure.NB	Unclassified Neocallimastigaceae.1	2.08857	1.02629	1.92857	0.5	3.35714	1.70714	100
Unclassified Neocallimastigaceae.1	0.0625	0.102823	Baseline_AlfaSainNB		Basline.NB	Unclassified Neocallimastigaceae.1	2.73929	0.611034	2.72857	1.77143	3.68571	0.825	100
Unclassified Neocallimastigaceae.1	0.000976562	0.0016066	Baseline_PAlfaB		PureAlfalfa.B	Unclassified Neocallimastigaceae.1	0.744156	0.30442	0.7	0.3	1.45714	0.278571	100
Unclassified Neocallimastigaceae.3	1	1	AlfaSainB_NB (not paired)		AlfalfaSainfoin.B	Unclassified Neocallimastigaceae.3	0.0785714	0.056964	0.0857143	0	0.157143	0.0642857	83.3333
Unclassified Neocallimastigaceae.3	0.00195312	0.0047433	Baseline_AlfaAlfasureNB		AlfalfaSainfoin.NB	Unclassified Neocallimastigaceae.3	0.06	0.0456249	0.0285714	0.0285714	0.128571	0.0571429	100
Unclassified Neocallimastigaceae.3	0.03125	0.0419408	Baseline_AlfaSainB		AlfalfaAlfasure.NB	Unclassified Neocallimastigaceae.3	0.0942857	0.0513756	0.114286	0.0142857	0.171429	0.0714286	100
Unclassified Neocallimastigaceae.3	0.0625	0.102823	Baseline_AlfaSainNB		Basline.NB	Unclassified Neocallimastigaceae.3	0.171429	0.0810415	0.157143	0.0428571	0.342857	0.0392857	100
Unclassified Neocallimastigaceae.3	0.000976562	0.0016066	Baseline_PAlfaB		PureAlfalfa.B	Unclassified Neocallimastigaceae.3	0.0246753	0.0212765	0.0142857	0.0142857	0.0857143	0.0142857	100
Unclassified Neocallimastigaceae.4	0.662338	1	AlfaSainB_NB (not paired)		AlfalfaAlfasure.NB	Unclassified Neocallimastigaceae.4	0.07	0.0789529	0.0428571	0	0.242857	0.0821429	80
Unclassified Neocallimastigaceae.4	0.492188	0.512277	Baseline_AlfaAlfasureNB		AlfalfaSainfoin.NB	Unclassified Neocallimastigaceae.4	0.00857143	0.0127775	0	0	0.0285714	0.0142857	40
Unclassified Neocallimastigaceae.4	0.03125	0.0419408	Baseline_AlfaSainB		Basline.NB	Unclassified Neocallimastigaceae.4	0.097619	0.121956	0.0428571	0	0.357143	0.103571	91.6667
Unclassified Neocallimastigaceae.4	0.0625	0.102823	Baseline_AlfaSainNB		PureAlfalfa.B	Unclassified Neocallimastigaceae.4	0.0181818	0.0326333	0	0	0.1	0.0214286	36.3636
Unclassified Neocallimastigaceae.4	0.00195312	0.00255409	Baseline_PAlfaB		AlfalfaSainfoin.B	Unclassified Neocallimastigaceae.4	0.0142857	0.0239046	0	0	0.0571429	0.0214286	33.3333
Unclassified Neocallimastigaceae.5	0.536797	1	AlfaSainB_NB (not paired)		AlfalfaAlfasure.NB	Unclassified Neocallimastigaceae.5	0.0314286	0.0475237	0.0214286	0	0.157143	0.0392857	60
Unclassified Neocallimastigaceae.5	0.0195312	0.0255409	Baseline_AlfaAlfasureNB		PureAlfalfa.B	Unclassified Neocallimastigaceae.5	0.0025974	0.00577886	0	0	0.0142857	0	18.1818
Unclassified Neocallimastigaceae.5	0.0625	0.0692935	Baseline_AlfaSainB		AlfalfaSainfoin.B	Unclassified Neocallimastigaceae.5	0.00714286	0.0119523	0	0	0.0285714	0.0107143	33.3333
Unclassified Neocallimastigaceae.5	0.0625	0.102823	Baseline_AlfaSainNB		AlfalfaSainfoin.NB	Unclassified Neocallimastigaceae.5	0	0	0	0	0	0	0
Unclassified Neocallimastigaceae.5	0.000976562	0.0016066	Baseline_PAlfaB		Basline.NB	Unclassified Neocallimastigaceae.5	0.0607143	0.0385859	0.0571429	0.0142857	0.142857	0.0357143	100
Unclassified Neocallimastigaceae.7	0.930736	1	AlfaSainB_NB (not paired)		AlfalfaAlfasure.NB	Unclassified Neocallimastigaceae.7	0.00714286	0.00752923	0.00714286	0	0.0142857	0.0142857	50
Unclassified Neocallimastigaceae.7	0.0195312	0.0255409	Baseline_AlfaAlfasureNB		PureAlfalfa.B	Unclassified Neocallimastigaceae.7	0.0012987	0.0043073	0	0	0.0142857	0	9.09091
Unclassified Neocallimastigaceae.7	0.09375	0.0975765	Baseline_AlfaSainB		Basline.NB	Unclassified Neocallimastigaceae.7	0.0142857	0.0136209	0.0142857	0	0.0428571	0.0178571	66.6667
Unclassified Neocallimastigaceae.7	0.0625	0.102823	Baseline_AlfaSainNB		AlfalfaSainfoin.B	Unclassified Neocallimastigaceae.7	0.0047619	0.00737711	0	0	0.0142857	0.0107143	33.3333
Unclassified Neocallimastigaceae.7	0.00292969	0.00355748	Baseline_PAlfaB		AlfalfaSainfoin.NB	Unclassified Neocallimastigaceae.7	0	0	0	0	0	0	0
