# Supplementary material for: Interrelationships of Fiber-Associated Anaerobic Fungi and Bacterial Communities in the Rumen of Bloated Cattle Grazing Alfalfa
Source: Microorganisms. 2020 Oct 7;8(10):1543. doi: 10.3390/microorganisms8101543 (PMC7601590; doi:10.3390/microorganisms8101543)
Supplement: Supplementary file 1 [file microorganisms-08-01543-s001.zip › Supplementary_File3.xlsx]

## Sheet: Fungi_metadata
#SampleID	BarcodeSequence	LinkerPrimerSequence	period	Treatment	CowID	bloatscore	BloatStatus	Description
f.103	ATCACCAGGTGT	TATGGTAATTGTACTCCTACGGGAGGCAG	1	AlfalfaAlfasure	66	0	NB	f.103
f.108	TGGTCAACGATA	TATGGTAATTGTACTCCTACGGGAGGCAG	1	AlfalfaAlfasure	87	0	NB	f.108
f.198	ACGAGACTGATT	TATGGTAATTGTACTCCTACGGGAGGCAG	1	AlfalfaAlfasure	41	0	NB	f.198
f.204	TACAGCGCATAC	TATGGTAATTGTACTCCTACGGGAGGCAG	1	AlfalfaAlfasure	315	0	NB	f.204
f.234	ATCGCACAGTAA	TATGGTAATTGTACTCCTACGGGAGGCAG	2	AlfalfaAlfasure	110	0	NB	f.234
f.270	TCCCTTGTCTCC	TATGGTAATTGTACTCCTACGGGAGGCAG	2	AlfalfaAlfasure	7	0	NB	f.270
f.318	ATCCTTTGGTTC	TATGGTAATTGTACTCCTACGGGAGGCAG	2	AlfalfaAlfasure	272	0	NB	f.318
f.366	ACCGGTATGTAC	TATGGTAATTGTACTCCTACGGGAGGCAG	3	AlfalfaAlfasure	346	0	NB	f.366
f.402	AGCGGAGGTTAG	TATGGTAATTGTACTCCTACGGGAGGCAG	3	AlfalfaAlfasure	178	0	NB	f.402
f.444	GCTGTACGGATT	TATGGTAATTGTACTCCTACGGGAGGCAG	3	AlfalfaAlfasure	48	0	NB	f.444
f.282	GATCTGCGATCC	TATGGTAATTGTACTCCTACGGGAGGCAG	2	AlfalfaSainfoin	315	0	NB	f.282
f.330	AATTGTGTCGGA	TATGGTAATTGTACTCCTACGGGAGGCAG	2	AlfalfaSainfoin	41	0	NB	f.330
f.336	GAATACCAAGTC	TATGGTAATTGTACTCCTACGGGAGGCAG	2	AlfalfaSainfoin	87	0	NB	f.336
f.414	TAACGTGTGTGC	TATGGTAATTGTACTCCTACGGGAGGCAG	3	AlfalfaSainfoin	153	0	NB	f.414
f.450	CCAATACGCCTG	TATGGTAATTGTACTCCTACGGGAGGCAG	3	AlfalfaSainfoin	272	0	NB	f.450
f.120	CAGCTCATCAGC	TATGGTAATTGTACTCCTACGGGAGGCAG	1	AlfalfaSainfoin	346	1	B	f.120
f.162	AGTCGAACGAGG	TATGGTAATTGTACTCCTACGGGAGGCAG	1	AlfalfaSainfoin	48	1	B	f.162
f.216	TGCATACACTGG	TATGGTAATTGTACTCCTACGGGAGGCAG	1	AlfalfaSainfoin	43	1	B	f.216
f.288	ACCAGTGACTCA	TATGGTAATTGTACTCCTACGGGAGGCAG	2	AlfalfaSainfoin	66	1	B	f.288
f.372	GTAGATCGTGTA	TATGGTAATTGTACTCCTACGGGAGGCAG	3	AlfalfaSainfoin	110	1	B	f.372
f.210	CATTATGGCGTG	TATGGTAATTGTACTCCTACGGGAGGCAG	1	AlfalfaSainfoin	178	2	B	f.210
f.11	AGTTACGAGCTA	TATGGTAATTGTACTCCTACGGGAGGCAG	0	Basline	315	0	NB	f.11
f.17	GTATCTGCGCGT	TATGGTAATTGTACTCCTACGGGAGGCAG	0	Basline	87	0	NB	f.17
f.24	GCAACACCATCC	TATGGTAATTGTACTCCTACGGGAGGCAG	0	Basline	41	0	NB	f.24
f.29	CAACTCCCGTGA	TATGGTAATTGTACTCCTACGGGAGGCAG	0	Basline	110	0	NB	f.29
f.35	CAAACAACAGCT	TATGGTAATTGTACTCCTACGGGAGGCAG	0	Basline	7	0	NB	f.35
f.41	AGATTGACCAAC	TATGGTAATTGTACTCCTACGGGAGGCAG	0	Basline	272	0	NB	f.41
f.47	CGAGGGAAAGTC	TATGGTAATTGTACTCCTACGGGAGGCAG	0	Basline	153	0	NB	f.47
f.5	AGTCGTGCACAT	TATGGTAATTGTACTCCTACGGGAGGCAG	0	Basline	66	0	NB	f.5
f.53	CAAATTCGGGAT	TATGGTAATTGTACTCCTACGGGAGGCAG	0	Basline	178	0	NB	f.53
f.59	CGAGCAATCCTA	TATGGTAATTGTACTCCTACGGGAGGCAG	0	Basline	48	0	NB	f.59
f.66	GCGATATATCGC	TATGGTAATTGTACTCCTACGGGAGGCAG	0	Basline	43	0	NB	f.66
f.71	GCATATGCACTG	TATGGTAATTGTACTCCTACGGGAGGCAG	0	Basline	346	0	NB	f.71
f.186	TTGCGTTAGCAG	TATGGTAATTGTACTCCTACGGGAGGCAG	1	PureAlfalfa	7	1	B	f.186
f.294	TCGGAATTAGAC	TATGGTAATTGTACTCCTACGGGAGGCAG	2	PureAlfalfa	346	1	B	f.294
f.342	TAATACGGATCG	TATGGTAATTGTACTCCTACGGGAGGCAG	3	PureAlfalfa	315	1	B	f.342
f.348	TCGACATCTCTT	TATGGTAATTGTACTCCTACGGGAGGCAG	3	PureAlfalfa	87	1	B	f.348
f.354	TACGAGCCCTAA	TATGGTAATTGTACTCCTACGGGAGGCAG	3	PureAlfalfa	41	1	B	f.354
f.360	ACCATAGCTCCG	TATGGTAATTGTACTCCTACGGGAGGCAG	3	PureAlfalfa	66	1	B	f.360
f.84	AAGGCGCTCCTT	TATGGTAATTGTACTCCTACGGGAGGCAG	1	PureAlfalfa	272	1	B	f.84
f.90	GAGCCATCTGTA	TATGGTAATTGTACTCCTACGGGAGGCAG	1	PureAlfalfa	153	2	B	f.90
f.252	TTGGGTACACGT	TATGGTAATTGTACTCCTACGGGAGGCAG	2	PureAlfalfa	178	3	B	f.252
f.264	TGCAGTCCTCGA	TATGGTAATTGTACTCCTACGGGAGGCAG	2	PureAlfalfa	48	3	B	f.264
f.75	GAACACTTTGGA	TATGGTAATTGTACTCCTACGGGAGGCAG	1	PureAlfalfa	110	3	B	f.75

## Sheet: Bacterial_metadata
Fungal and bacterial metadata.
#SampleID	BarcodeSequence	LinkerPrimerSequence	period	treatment	cowid	bloatscore	bloatStatus	Description
b.103	CAACTCCCGTGA	TATGGTAATTGTACTCCTACGGGAGGCAG	1	AlfalfaAlfasure	66	0	NB	103
b.108	TACGAGCCCTAA	TATGGTAATTGTACTCCTACGGGAGGCAG	1	AlfalfaAlfasure	87	0	NB	108
b.198	ACTTCCAACTTC	TATGGTAATTGTACTCCTACGGGAGGCAG	1	AlfalfaAlfasure	41	0	NB	198
b.204	GTGTTGTCGTGC	TATGGTAATTGTACTCCTACGGGAGGCAG	1	AlfalfaAlfasure	315	0	NB	204
b.234	ATTCTGCCGAAG	TATGGTAATTGTACTCCTACGGGAGGCAG	2	AlfalfaAlfasure	110	0	NB	234
b.270	GGACTTCCAGCT	TATGGTAATTGTACTCCTACGGGAGGCAG	2	AlfalfaAlfasure	7	0	NB	270
b.318	TCTTGGAGGTCA	TATGGTAATTGTACTCCTACGGGAGGCAG	2	AlfalfaAlfasure	272	0	NB	318
b.366	CATACCGTGAGT	TATGGTAATTGTACTCCTACGGGAGGCAG	3	AlfalfaAlfasure	346	0	NB	366
b.402	TGCAGCAAGATT	TATGGTAATTGTACTCCTACGGGAGGCAG	3	AlfalfaAlfasure	178	0	NB	402
b.120	TCGACATCTCTT	TATGGTAATTGTACTCCTACGGGAGGCAG	1	AlfalfaSainfoin	346	1	B	120
b.162	ATGATGAGCCTC	TATGGTAATTGTACTCCTACGGGAGGCAG	1	AlfalfaSainfoin	48	1	B	162
b.210	TATCGACACAAG	TATGGTAATTGTACTCCTACGGGAGGCAG	1	AlfalfaSainfoin	178	2	B	210
b.216	CGTAATTGCCGC	TATGGTAATTGTACTCCTACGGGAGGCAG	1	AlfalfaSainfoin	43	1	B	216
b.282	TGTAACGCCGAT	TATGGTAATTGTACTCCTACGGGAGGCAG	2	AlfalfaSainfoin	315	0	NB	282
b.288	TACCGCTTCTTC	TATGGTAATTGTACTCCTACGGGAGGCAG	2	AlfalfaSainfoin	66	1	B	288
b.330	TCATGCTCCATT	TATGGTAATTGTACTCCTACGGGAGGCAG	2	AlfalfaSainfoin	41	0	NB	330
b.336	GAGAGCAACAGA	TATGGTAATTGTACTCCTACGGGAGGCAG	2	AlfalfaSainfoin	87	0	NB	336
b.372	CCTGCGAAGTAT	TATGGTAATTGTACTCCTACGGGAGGCAG	3	AlfalfaSainfoin	110	1	B	372
b.414	GTAGAGGTAGAG	TATGGTAATTGTACTCCTACGGGAGGCAG	3	AlfalfaSainfoin	153	0	NB	414
b.450	ACGACTGCATAA	TATGGTAATTGTACTCCTACGGGAGGCAG	3	AlfalfaSainfoin	272	0	NB	450
b.5	ACGAGACTGATT	TATGGTAATTGTACTCCTACGGGAGGCAG	0	Basline	66	0	NB	5
b.11	ATCACCAGGTGT	TATGGTAATTGTACTCCTACGGGAGGCAG	0	Basline	315	0	NB	11
b.17	ATCGCACAGTAA	TATGGTAATTGTACTCCTACGGGAGGCAG	0	Basline	87	0	NB	17
b.24	AGCGGAGGTTAG	TATGGTAATTGTACTCCTACGGGAGGCAG	0	Basline	41	0	NB	24
b.35	AATTGTGTCGGA	TATGGTAATTGTACTCCTACGGGAGGCAG	0	Basline	7	0	NB	35
b.41	AGTCGAACGAGG	TATGGTAATTGTACTCCTACGGGAGGCAG	0	Basline	272	0	NB	41
b.47	GAATACCAAGTC	TATGGTAATTGTACTCCTACGGGAGGCAG	0	Basline	153	0	NB	47
b.53	TAACGTGTGTGC	TATGGTAATTGTACTCCTACGGGAGGCAG	0	Basline	178	0	NB	53
b.66	CAGCTCATCAGC	TATGGTAATTGTACTCCTACGGGAGGCAG	0	Basline	43	0	NB	66
b.71	GCAACACCATCC	TATGGTAATTGTACTCCTACGGGAGGCAG	0	Basline	346	0	NB	71
b.75	CGAGCAATCCTA	TATGGTAATTGTACTCCTACGGGAGGCAG	1	PureAlfalfa	110	3	B	75
b.84	GTATCTGCGCGT	TATGGTAATTGTACTCCTACGGGAGGCAG	1	PureAlfalfa	272	1	B	84
b.90	CAAATTCGGGAT	TATGGTAATTGTACTCCTACGGGAGGCAG	1	PureAlfalfa	153	2	B	90
b.186	GTGGAGTCTCAT	TATGGTAATTGTACTCCTACGGGAGGCAG	1	PureAlfalfa	7	1	B	186
b.252	TGCGCTGAATGT	TATGGTAATTGTACTCCTACGGGAGGCAG	2	PureAlfalfa	178	3	B	252
b.264	GCGTTCTAGCTG	TATGGTAATTGTACTCCTACGGGAGGCAG	2	PureAlfalfa	48	3	B	264
b.294	GATTATCGACGA	TATGGTAATTGTACTCCTACGGGAGGCAG	2	PureAlfalfa	346	1	B	294
b.342	CGTGCTTAGGCT	TATGGTAATTGTACTCCTACGGGAGGCAG	3	PureAlfalfa	315	1	B	342
b.348	CACTCATCATTC	TATGGTAATTGTACTCCTACGGGAGGCAG	3	PureAlfalfa	87	1	B	348
b.354	TATCTATCCTGC	TATGGTAATTGTACTCCTACGGGAGGCAG	3	PureAlfalfa	41	1	B	354
b.360	AGTAGCGGAAGA	TATGGTAATTGTACTCCTACGGGAGGCAG	3	PureAlfalfa	66	1	B	360
