# Supplementary figures and images for: Interrelationships of Fiber-Associated Anaerobic Fungi and Bacterial Communities in the Rumen of Bloated Cattle Grazing Alfalfa
Source: MDPI journal article supplement (doi:10.3390/microorganisms8101543), 2020-10-07

A)

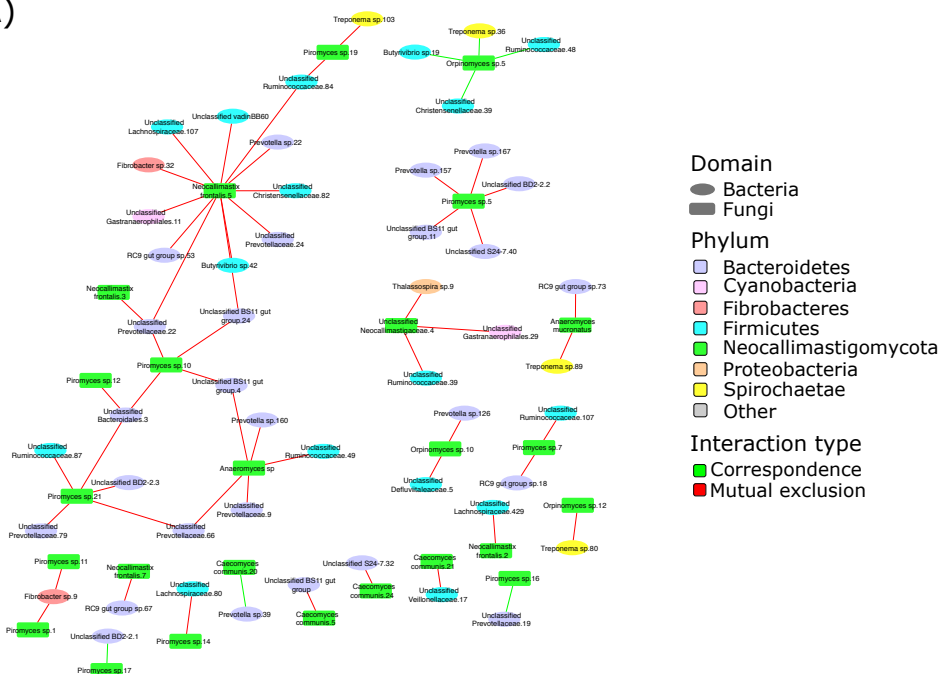

B)

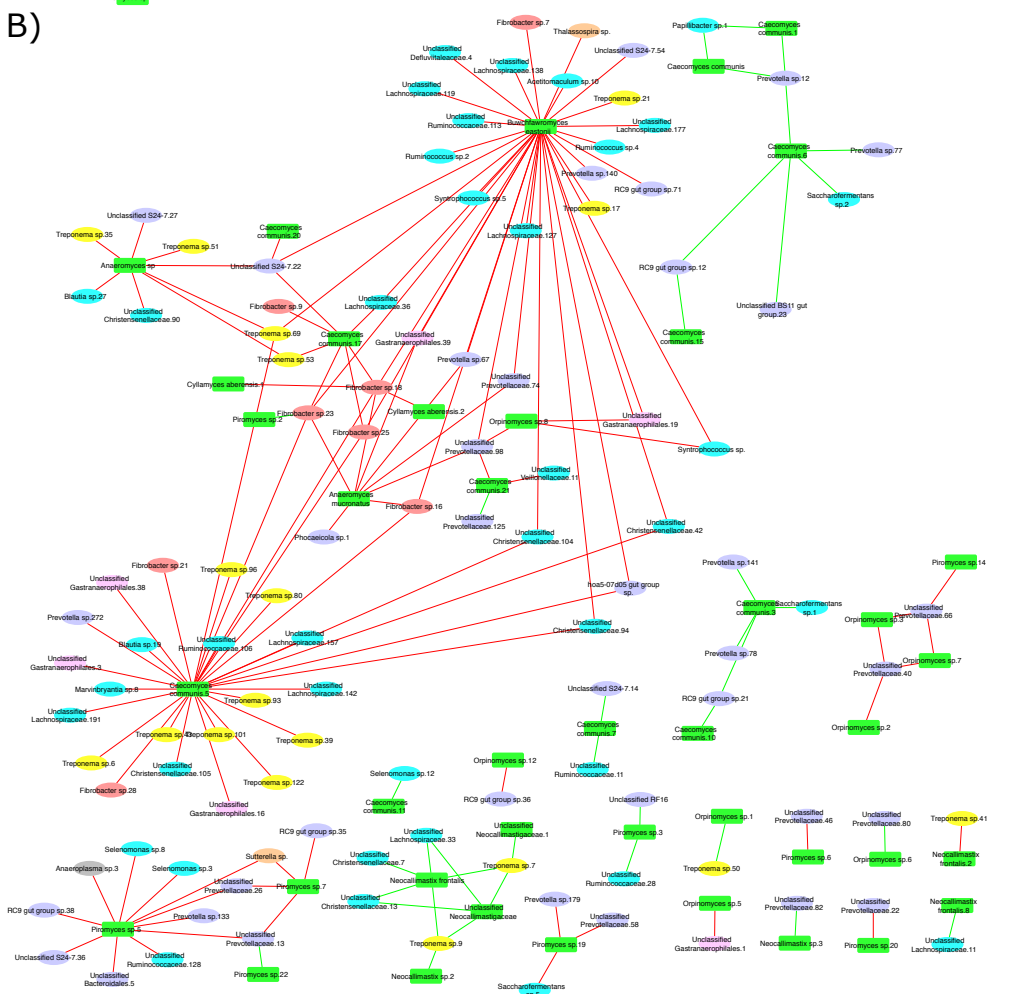

Supplement: s1 [file s1]

A)

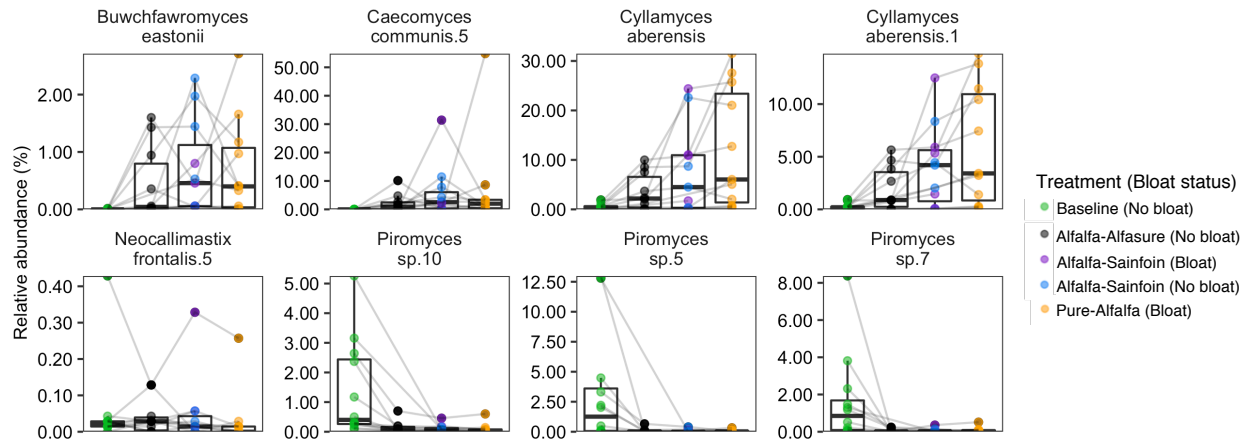

B)

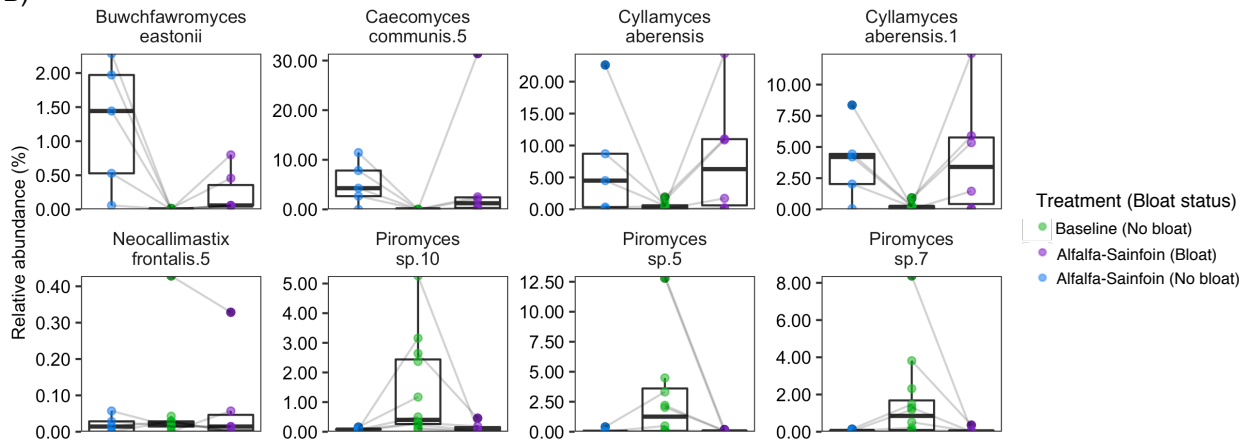

Supplement: s1 [file s1]
